# Supplementary material for: The clinical impact of serious respiratory disease in children under the age of two during the 2021-2022 bronchiolitis season in the United Kingdom and Ireland
Source: bioRxiv or medRxiv preprint supplement (doi:10.1101/2023.02.22.23285616), 2023-02-23
Supplement: Supplementary file [file media-1.pdf]

## Supplementary File 1 version 2

### PERUKI Site Leads and Co-leads

| Site                                                                                | Country | City         | Site lead               | Co-lead                        |
|-------------------------------------------------------------------------------------|---------|--------------|-------------------------|--------------------------------|
| Alder Hey Children's Hospital NHS Foundation Trust                                  | England | Liverpool    | Meriel Tolhurst-Cleaver |                                |
| Birmingham Children's Hospital                                                      | England | Birmingham   | Stuart Hartshorn        |                                |
| Bolton NHS Foundation Trust                                                         | England | Bolton       | Jessica Watson          |                                |
| Bristol Royal Hospital for Children                                                 | England | Bristol      | Roisin Begley           |                                |
| Chelsea and Westminster NHS Foundation Trust, Chelsea and Westminster Hospital site | England | London       | Sakura Hingley          | Manali Dutta,<br>Gemma Ramsden |
| Children's Health Ireland at Crumlin                                                | Ireland | Dublin       | Eleanor Ryan            |                                |
| Children's Health Ireland at Tallaght                                               | Ireland | Dublin       | Sheena Durnin           | Stanley Koe                    |
| Countess of Chester NHS Foundation Trust                                            | England | Chester      | Steve Brearey           |                                |
| Croydon University Hospital                                                         | England | Croydon      | Darren Ranasinghe       |                                |
| East Cheshire NHS Trust                                                             | England | Macclesfield | Mudiyur Gopi            |                                |

|                                           |         |            |                  |                   |
|-------------------------------------------|---------|------------|------------------|-------------------|
| Frimley Park Hospital                     | England | London     | Patrick Aldridge | Vicky Owens       |
| Hull Royal Infirmary                      | England | Hull       | Simon Richardson |                   |
| Ipswich Hospital                          | England | Ipswich    | David Hartin     |                   |
| John Radcliffe Hospital                   | England | Oxford     | Jiske Steensma   | Sahana Rao        |
| Leicester Royal Infirmary                 | England | Leicester  | Damian Roland    |                   |
| Leighton Hospital                         | England | Crewe      | Jo Tillett       | Simon Dowson      |
| Medway Hospital NHS Foundation Trust      | England | Gillingham | Adebayo Da Costa | Alfred Sime       |
| Newham University Hospital                | England | Newham     | Claire Kirby     |                   |
| North Middlesex Hospital                  | England | London     | Adam Lawton      |                   |
| Nottingham University Hospitals NHS Trust | England | Nottingham | Ruth Wear        | Christopher Gough |
| Ormskirk & District General Hospital      | England | Ormskirk   | Sharryn Gardner  | Craig Rimmer      |

|                                                       |          |               |                    |                          |
|-------------------------------------------------------|----------|---------------|--------------------|--------------------------|
| Poole Hospital                                        | England  | Poole         | Heather Deall      |                          |
| Queen Elizabeth Hospital, Woolwich                    | England  | London        | Sharon Hall        |                          |
| Royal Aberdeen Children's Hospital                    | Scotland | Aberdeen      | Catriona Middleton |                          |
| Royal Alexandra Children's Hospital                   | England  | Brighton      | Emily Walton       | Friyana Dastur Mackenzie |
| Royal Berkshire NHS Foundation Trust                  | England  | Reading       | Manish Thakker     |                          |
| Royal Derby Hospital                                  | England  | Derby         | Gisela Robinson    | Graham Johnson           |
| Royal Hospital for Children, Glasgow                  | Scotland | Glasgow       | Steve Foster       |                          |
| Royal Hospital for Children & Young People, Edinburgh | Scotland | Edinburgh     | Jen Browning       | Lynsey Rooney            |
| Royal Wolverhampton NHS Trust                         | England  | Wolverhampton | Lorna Bagshaw      |                          |
| Salisbury NHS Foundation Trust                        | England  | Salisbury     | Seb Gray           |                          |
| Sheffield Children's NHS Foundation Trust             | England  | Sheffield     | Sally Gibbs        |                          |
| South Tyneside & Sunderland NHS Foundation Trust      | England  | Sunderland    | Niall Mullen       |                          |

|                                                 |          |             |                         |                 |
|-------------------------------------------------|----------|-------------|-------------------------|-----------------|
| Southampton Children's Hospital                 | England  | Southampton | Jane Bayreuther         |                 |
| St George's Hospital, London                    | England  | London      | Heather Jarman          |                 |
| St Helens & Knowsley NHS Trust                  | England  | Rainhill    | Clare O'Leary           |                 |
| The Royal London                                | England  | London      | Raine Astin-Chamberlain |                 |
| University Hospital Crosshouse                  | Scotland | Kilmarnock  | Lawrence Armstrong      | Joanne Mulligan |
| University Hospital Lewisham                    | England  | London      | Sophie Keers            |                 |
| Watford General Hospital (West Herts NHS Trust) | England  | Watford     | Richard Burrige         |                 |
| Wexham Park Hospital                            | England  | Slough      | Sarah Wilson            |                 |
| Whipps Cross Hospital                           | England  | London      | Amutha Anpananthar      |                 |
| Wirral University NHSFT                         | England  | Birkenhead  | David Lacy              |                 |
