# Supplementary material for: The clinical impact of serious respiratory disease in children under the age of two during the 2021-2022 bronchiolitis season in the United Kingdom and Ireland
Source: bioRxiv or medRxiv preprint supplement (doi:10.1101/2023.02.22.23285616), 2023-02-23
Supplement: Supplementary file [file media-2.pdf]

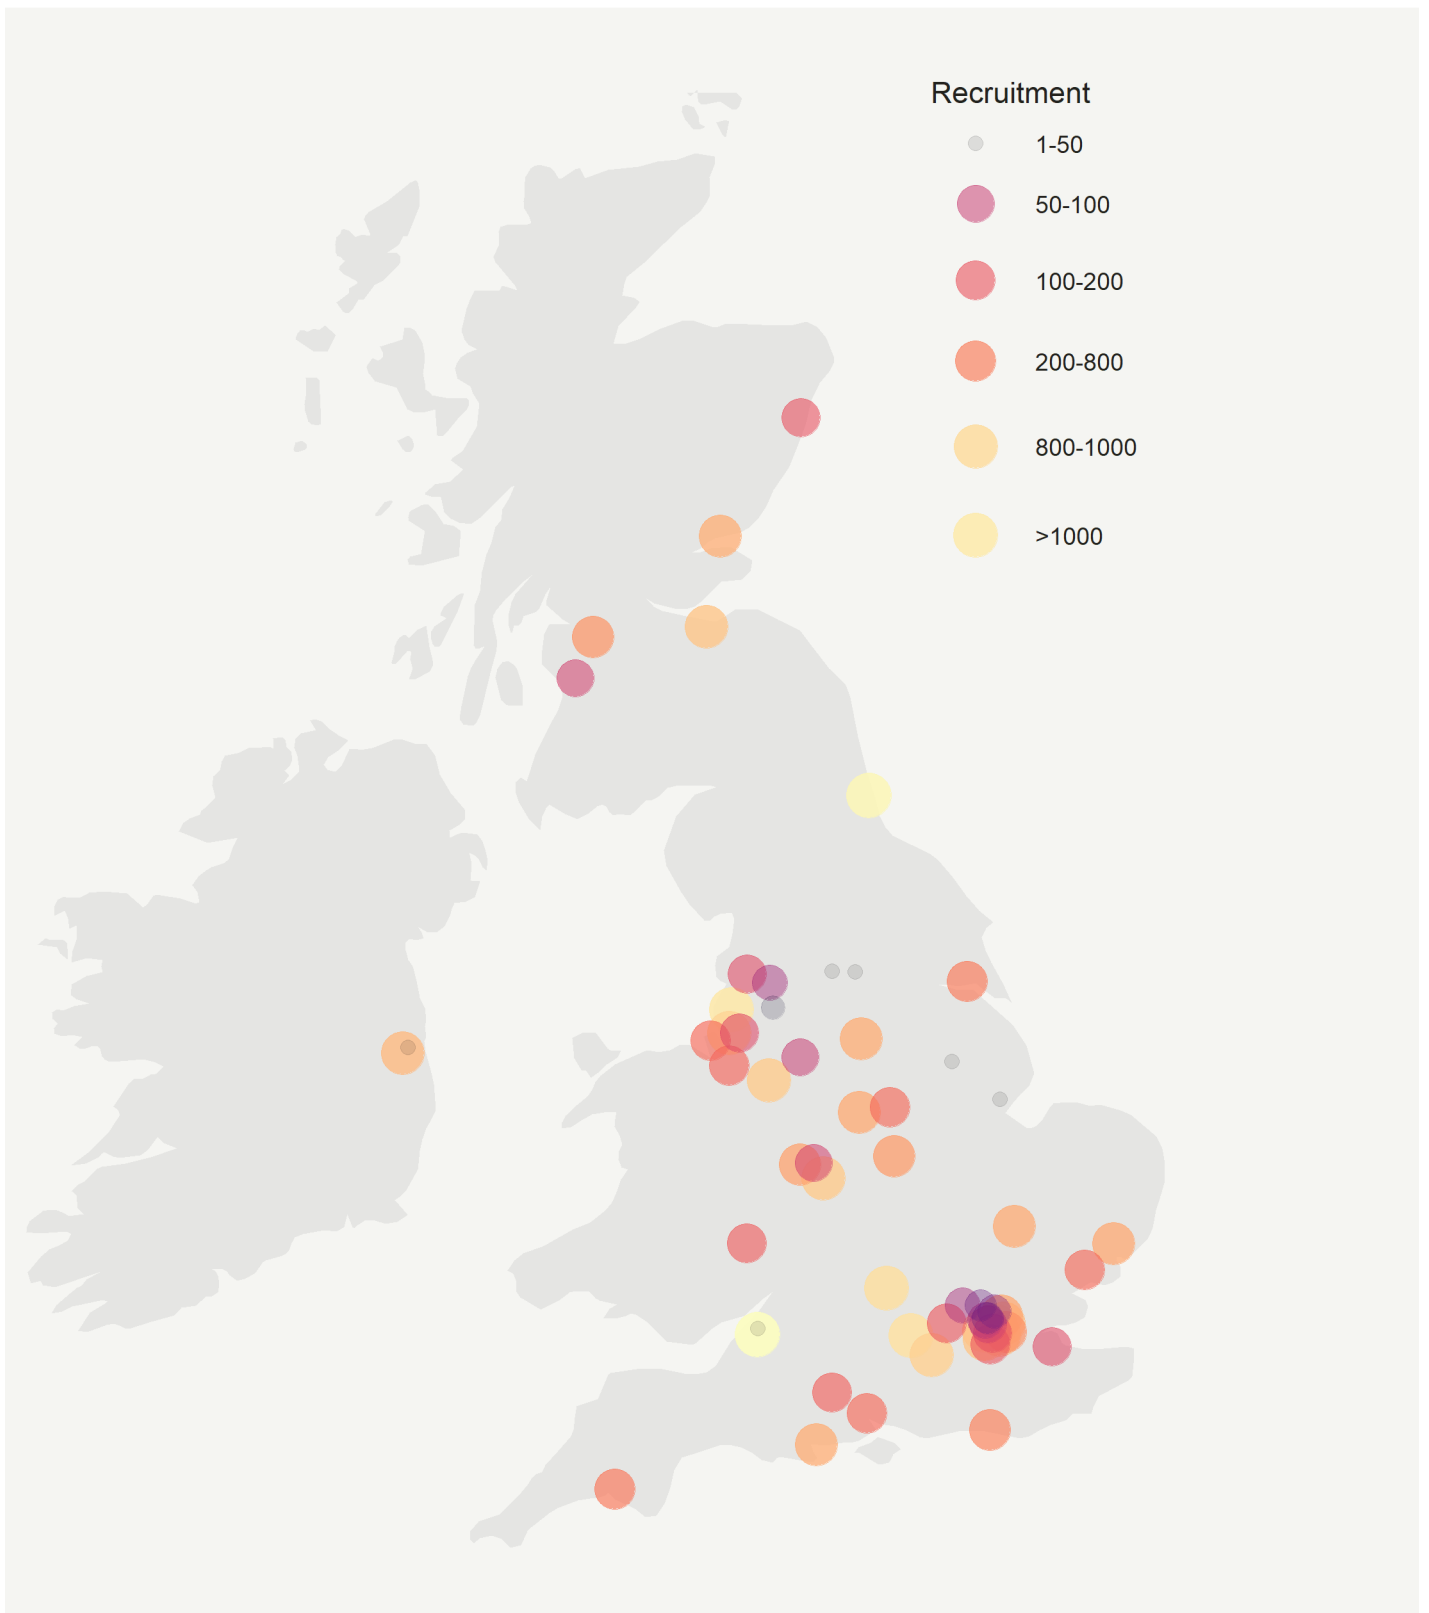

**Supplementary Figure 1 Recruitment to the BronchStart study from 1 May 2021 to 30 April 2022 by site location and number of attendance per site.**
